# Supplementary material for: Performance of Screening Strategies for Latent Tuberculosis Infection in Patients with Inflammatory Bowel Disease: Results from the ENEIDA Registry of GETECCU
Source: MDPI journal article supplement (doi:10.3390/jcm11133915), 2022-07-05
Supplement: s1 [file s1]

**Supplementary Materials.** List of centres participating in the study;

- . Hospital Universitario Central de Asturias, and Instituto de Investigación Sanitaria del Principado de Asturias (ISPA), Oviedo, Spain
- . Hospital Clínico Universitario San Carlos, and Instituto de Investigación del Hospital Clínico San Carlos [IdISSC], Madrid, Spain
- . Hospital Universitari Mútua Terrassa, Centro de Investigación Biomédica en Red de Enfermedades Hepáticas y Digestivas (CIBERehd), Terrassa, Spain
- . Complejo Hospitalario Universitario de Pontevedra, Pontevedra, Spain
- . Hospital Universitario de La Princesa, Instituto de Investigación Sanitaria Princesa (IIS-IP), Universidad Autónoma de Madrid (UAM), Centro de Investigación Biomédica en Red de Enfermedades Hepáticas y Digestivas (CIBERehd), Madrid, Spain
- . Hospital Universitario Río Hortega, Valladolid, Spain
- . Hospital Universitario Marqués de Valdecilla, Universidad de Cantabria, Instituto de Investigación Sanitaria Valdecilla (IDIVAL), Santander, Spain
- . Hospital Universitario Ramón y Cajal, Madrid, Spain
- . Hospital Universitari i Politecnic La Fe and CIBERehd, Valencia, Spain
- . Hospital Universitario Miguel Servet, Instituto de Investigación Sanitaria Aragón (IISA), Zaragoza, Spain
- . Hospital Universitari Germans Trias i Pujol and CIBERehd, Badalona, Spain
- . Hospital Universitario La Paz, and Instituto de Investigación Sanitaria del Hospital La Paz (IdiPAZ), Madrid, Spain
- . Hospital Universitario Fundación Alcorcón, Madrid, Spain
- . Hospital Universitario de Bellvitge, and Institut d'Investigació Biomèdica de Bellvitge (IDIBELL), Barcelona, Spain
- . Hospital Universitario de Salamanca, Salamanca, Spain
- . Hospital Nuestra Señora de la Candelaria, Tenerife, Spain
- . Hospital de Galdakao-Usansolo, Galdakao, Vizcaya, Spain
- . Hospital General Universitario de Elche, Alicante, Spain
- . Hospital Sant Joan Despí-Moisès Broggi, Barcelona, Spain
- . Hospital San Jorge, Huesca, Spain
- . Hospital Clinic i Provincial and CIBERehd, IDIBAPS, Barcelona, Spain
- . Hospital Universitario de Fuenlabrada and Instituto de Investigación Sanitaria . Hospital La Paz (IdiPaz), Madrid, Spain
- . Hospital Universitari Parc Taulí, Sabadell, Departament de Medicina, Universitat Autònoma de Barcelona and CIBERehd, Barcelona, Spain
- . Consorcio Sanitario de Terrasa, Barcelona, Spain
- . Hospital de la Santa Creu i Sant Pau, Barcelona, Spain
- . Hospital del Mar and Institut Hospital del Mar d'Investigacions Mèdiques, Barcelona, Spain
- . Hospital Clínico Universitario de Valencia, Valencia, Spain
- . Hospital Universitario de Torrejón, Madrid, Spain
- . Hospital Universitario de Donostia/Biodonostia, Universidad del País Vasco (UPV/EHU), CIBERehd, San Sebastián, Spain
- . Hospital Universitario de Girona Dr Josep Trueta, Girona, Spain
- . Hospital Universitario de Burgos, Burgos, Spain
- . Hospital Reina Sofía, IMIBIC, Córdoba, Spain

. Hospital Clínico de Málaga, Málaga, Spain

Table S1. Factors associated with diagnosis of LTBI in IBD patients who were not undergoing anti-TNF treatment at screening

|                            | Univariable analysis |            |        | Multivariable analysis |           |        |
|----------------------------|----------------------|------------|--------|------------------------|-----------|--------|
|                            | Odds ratio           | 95% CI     | p      | Odds ratio             | 95% CI    | p      |
| <b>Gender</b>              |                      |            |        |                        |           |        |
| Female                     | Reference            |            |        | Reference              |           |        |
| Male                       | 1.21                 | 1.07-1.36  | 0.002  | 1.20                   | 1.06-1.36 | 0.003  |
| Age at TB screening, years | 1.04                 | 1.03-1.04  | <0.001 | 1.04                   | 1.04–1.05 | <0.001 |
| <b>Type of IBD</b>         |                      |            |        |                        |           |        |
| IBD-unclassified           | Reference            |            |        | Reference              |           |        |
| Ulcerative colitis         | 0.84                 | 0.57-1.27  | 0.40   | 0.78                   | 0.52–1.21 | 0.25   |
| Crohn's disease            | 0.90                 | 0.62-1.36  | 0.62   | 0.92                   | 0.61–1.41 | 0.70   |
| <b>Smoking status</b>      |                      |            |        |                        |           |        |
| Never                      | Reference            |            |        | Reference              |           |        |
| Ever                       | 1.58                 | 1.40-1.79  | <0.001 | 1.53                   | 1.34–1.75 | <0.001 |
| Unknown                    | 1.03                 | 0.79-1.32  | 0.81   | 0.86                   | 0.65–1.13 | 0.29   |
| <b>IMM at TB screening</b> |                      |            |        |                        |           |        |
| No                         | Reference            |            |        | Reference              |           |        |
| Yes                        | 0.82                 | 0.72-0.94  | 0.005  | 0.82                   | 0.71–0.95 | 0.007  |
| <b>Geographical area</b>   |                      |            |        |                        |           |        |
| Madrid                     | Reference            |            |        | Reference              |           |        |
| Aragón                     | 0.87                 | 0.67-1.12  | 0.28   | 0.91                   | 0.69–1.19 | 0.50   |
| Asturias                   | 0.98                 | 0.74-1.29  | 0.90   | 1.16                   | 0.87–1.54 | 0.30   |
| Canarias                   | 0.70                 | 0.40-1.15  | 0.18   | 0.59                   | 0.33–1.01 | 0.07   |
| Cantabria                  | 1.34                 | 1.07-1.68  | 0.009  | 1.39                   | 1.10–1.75 | 0.006  |
| Castilla-León              | 1.52                 | 1.25-1.84  | <0.001 | 1.99                   | 1.61–2.45 | <0.001 |
| Catalonia                  | 1.25                 | 1.06-1.46  | 0.007  | 1.47                   | 1.25–1.75 | <0.001 |
| Basque country             | 0.67                 | 0.44-10.98 | 0.05   | 0.79                   | 0.52–1.17 | 0.26   |
| Valencia                   | 0.55                 | 0.42-0.71  | <0.001 | 0.63                   | 0.47-0.82 | 0.001  |

|                                   |           |           |        |           |           |        |  |
|-----------------------------------|-----------|-----------|--------|-----------|-----------|--------|--|
| TB incidence in country of origin |           |           |        |           |           |        |  |
| Low / intermediate                | Reference |           |        | Reference |           |        |  |
| High                              | 2.13      | 1.64-2.75 | <0.001 | 3.53      | 2.68–4.64 | <0.001 |  |
| Year of TB screening              | 0.97      | 0.96-0.99 | 0.003  | 0.93      | 0.91–0.95 | <0.001 |  |

CI: confidence interval; TB tuberculosis; IBD: inflammatory bowel disease; IMM: immunomodulator;

**Table S2.** Frequency of LTBI among adult patients with IBD according to age and gender

| Patients with LTBI, number (%) |                          |           |          |         |
|--------------------------------|--------------------------|-----------|----------|---------|
| age                            | Number of patients (M/F) | Male      | Female   | P value |
| <26                            | 1136 (642/494)           | 45 (7.0)  | 34 (6.9) | 1       |
| 26–35                          | 1621 (832/789)           | 91 (10.9) | 92 (12)  | 0.70    |
| 36–45                          | 1819 (925/894)           | 166 (18)  | 147 (16) | 0.43    |
| 46–55                          | 1466 (762/704)           | 218 (29)  | 183 (26) | 0.29    |
| 56–65                          | 958 (529/429)            | 190 (36)  | 100 (23) | <0.001  |
| >65                            | 594 (298/296)            | 106 (36)  | 73 (25)  | 0.005   |
| Overall                        | 7594 (3988/3606)         | 816 (21)  | 629 (17) | 0.01    |

LTBI: latent tuberculosis infection; M: male; F: female

**Figure S1.-** Frequency of LTBI, positive result in TST and IGRA, depending on the year in which screening was performed in Spanish patients with IBD.

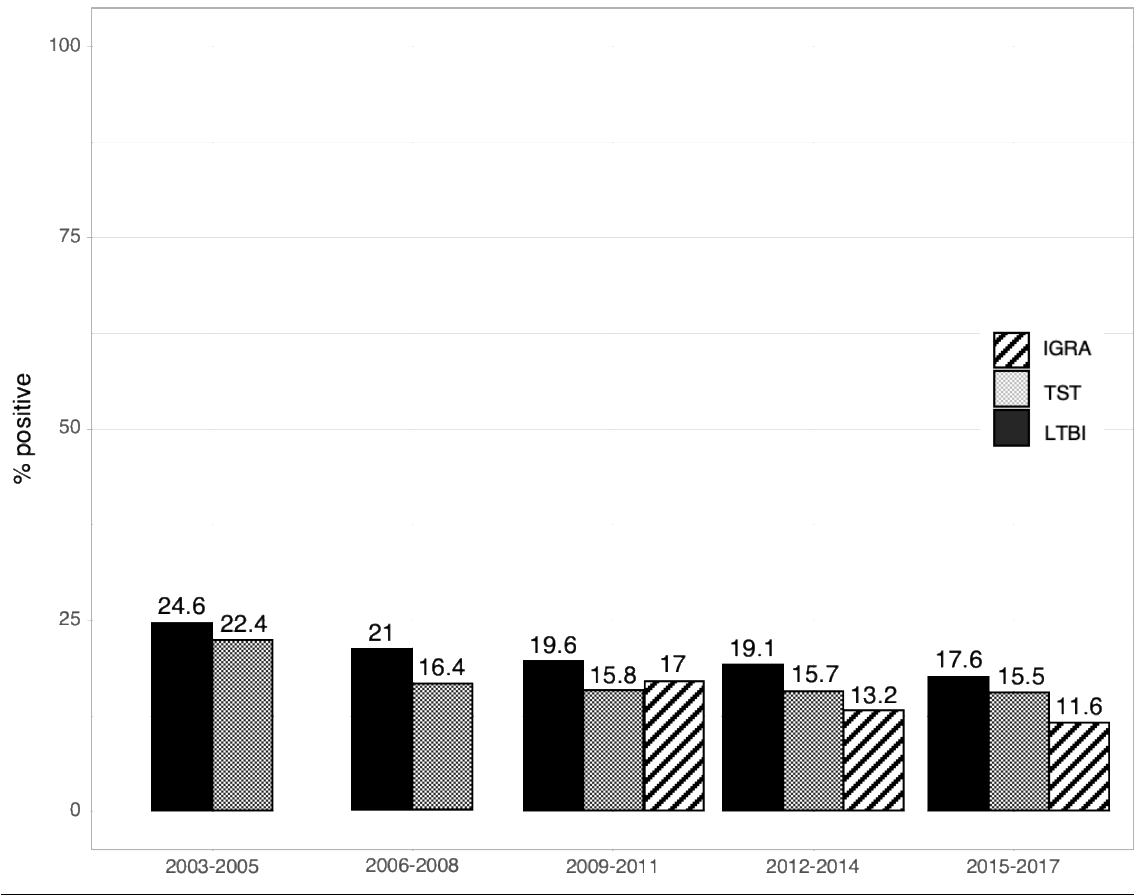

\_LTBI: latent tuberculosis infection; TST: tuberculin skin test; IGRA: interferon gamma release assay

**Table S3.** Probability (%) of LTBI in IBD patients who were not undergoing anti-TNF treatment at screening according to gender, smoking status, immunomodulator use at screening, strategy of screening (dual versus single, early versus routine) and origin in a country with a high or intermediate/low incidence of TB.

|                   |                               |              | Men          |          |        |          |        |          | Women        |          |        |          |        |          |
|-------------------|-------------------------------|--------------|--------------|----------|--------|----------|--------|----------|--------------|----------|--------|----------|--------|----------|
|                   |                               |              | IGRA and TST |          | IGRA   |          | TST    |          | IGRA and TST |          | IGRA   |          | TST    |          |
|                   |                               |              | No IMM       | With IMM | No IMM | With IMM | No IMM | With IMM | No IMM       | With IMM | No IMM | With IMM | No IMM | With IMM |
| Early screening   | High TB incidence             | Ever smoked  | 53           | 51       | 40     | 38       | 46     | 43       | 49           | 46       | 36     | 34       | 41     | 39       |
|                   |                               | Never smoked | 41           | 39       | 29     | 27       | 34     | 32       | 37           | 35       | 26     | 24       | 30     | 28       |
|                   | Low/intermediate TB incidence | Ever smoked  | 31           | 29       | 21     | 20       | 25     | 24       | 28           | 26       | 19     | 17       | 22     | 21       |
|                   |                               | Never smoked | 22           | 20       | 14     | 13       | 17     | 16       | 19           | 18       | 12     | 11       | 15     | 14       |
| Routine screening | High TB incidence             | Ever smoked  | 43           | 41       | 31     | 29       | 36     | 34       | 39           | 37       | 28     | 26       | 32     | 30       |
|                   |                               | Never smoked | 32           | 30       | 22     | 20       | 26     | 24       | 28           | 27       | 19     | 18       | 23     | 21       |
|                   | Low/intermediate TB incidence | Ever smoked  | 24           | 22       | 16     | 14       | 19     | 17       | 21           | 19       | 14     | 12       | 16     | 15       |
|                   |                               | Never smoked | 16           | 15       | 10     | 9        | 12     | 11       | 14           | 13       | 9      | 8        | 11     | 10       |

IGRA: interferon gamma release assay; TST: tuberculin skin test; IMM: immunomodulator; TB: tuberculosis
